# Supplementary material
Source: Research Square preprint supplement (doi:10.21203/rs.3.rs-8876163/v1)
Supplement: Supplementary file 1 [file 029467802ed463b1a72a6053.docx]

**Extended Data Table 2 |** Long COVID symptom inventory

| Symptom Domain | Symptom |
| --- | --- |
| Constitutional | Fatigue |
| Post-exertional malaise / post-exertional symptom exacerbation |
| Fever |
| Chills |
| Night sweats |
| Anorexia |
| Weight loss |
| Musculoskeletal | Myalgias |
| Arthralgias |
| Muscle weakness |
| Dermatological | Rash |
| Skin lesions |
| Hair loss |
| Neurological | Trouble with memory |
| Trouble with concentration |
| Confusion |
| Cognitive problems or “brain fog” |
| Headaches |
| Paresthesia |
| Dizziness / lightheadedness / vertigo |
| Trouble with smell (anosmia, hyposmia, parosmia) |
| Trouble with taste (dysgeusia, ageusia) |
| Vision change |
| Neuropsychiatric | Symptoms of depression |
| Symptoms of anxiety |
| Trouble with sleep |
| ENT (upper airway) | Trouble with voice (aphonia, dysphonia) |
| Sore throat |
| Nasal discharge |
| Tinnitus |
| Respiratory | Cough |
| Hemoptysis |
| Dyspnea |
| Shortness of breath at rest |
| Shortness of breath on exertion |
| Wheezing |
| Cardiovascular | Palpitations |
| Chest pain at rest |
| Chest pain on exertion |
| Pleuritic chest pain |
| Lower extremity edema |
| Abdominal | Abdominal pain or discomfort |
| Nausea |
| Vomiting |
| Diarrhea |
| Constipation |
| Rectal bleeding |
| Jaundice |
| Urinary | Dysuria |
| Oliguria or anuria |
| Hematuria |
