# Supplementary material
Source: Research Square preprint supplement (doi:10.21203/rs.3.rs-8876163/v1)
Supplement: Supplementary file 2 [file 0ab6c951f19349ee30ecf512.docx]

**Extended Data Table 4a |** Antibodies used for human flow cytometry

| Target/ Host species | Fluorophore | Dilution (final) | Clone | Catalogue Number | Vendor |
| --- | --- | --- | --- | --- | --- |
| Anti-human CD19 (mouse monoclonal) | BV650 | 1/320 | SJ25C1 | 563226 | BD |
| Anti-human IgM (mouse monoclonal) | BB515 | 1/66 | G20-127 | 564622 | BD |
| Anti-human CD10 (mouse monoclonal) | BV421 | 1/80 | HI10a | 562902 | BD |
| Anti-human CD83 (mouse monoclonal) | PE-Cy7 | 1/640 | HB15e | 561132 | BD |
| Anti-human CD27 (mouse monoclonal) | AF700 | 1/50 | M-T271 | 560611 | BD |
| Anti-human CD21 (mouse monoclonal) | PE | 1/40 | B-ly4 | 555422 | BD |
| Anti-human CD11c (mouse monoclonal) | BV605 | 1/320 | 3.9 | 301636 | BioLegend |
| Anti-human CD1c (mouse monoclonal) | PerCP efluor710 | 1/160 | L161 | 46-0015-42 | Thermo Fisher Scientific |
| Anti-human CD38 (mouse monoclonal) | APC | 1/320 | HIT2 | 17-0389-42 | Invitrogen |
| Anti-human IgG (mouse monoclonal) | APC-H7 | 1/320 | G18-145 | 561297 | BD |
| Anti-human CD14 (mouse monoclonal) | BV711 | 1/640 | MφP9 | 563372 | BD |
| Anti-human CD16 (mouse monoclonal) | BV785 | 1/640 | B73.1 | 360734 | BioLegend |
| Anti-human CD20 (mouse monoclonal) | BUV395 | 1/80 | 2H7 | 563782 | BD |
| Anti-human T-bet (mouse monoclonal) | PE | 1/5000 | 4B10 | 644811 | BioLegend |
| Anti-human NR4A3 (mouse monoclonal) | PE | 1/50 | H-7 | sc-393902 | Santa Cruz Biotechnology |
| Anti-human IgA (mouse monoclonal) | FITC | 1/320 | M-24A | CBL114F | Sigma Aldrich |
| Anti-human BAFF (mouse monoclonal) | PE | 1/160 | T7-241 | 318605 | BioLegend |
| Anti-human CD3 (mouse monoclonal) | BV421 | 1/320 | SK7 | 344834 | BioLegend |
| Anti-human CD66b (mouse monoclonal) | PE-Cy7 | 1/80 | G10F5 | 305166 | BioLegend |

**Extended Data Table 4b |** Antibodies used for mouse flow cytometry

| Target / Host species | Fluorophore | Dilution (final) | Clone | Catalogue number | Vendor |
| --- | --- | --- | --- | --- | --- |
| Anti-mouse CD45 (Rat monoclonal) | PE-Cy7 | 1/3200 | 30-F11 | 103113 | BioLegend |
| Anti-mouse CD11b (Rat monoclonal) | Pacific Blue | 1/400 | M1/70 | 101223 | BioLegend |
| Anti-mouse Ly6C (Rat monoclonal) | AF488 | 1/1600 | HK1.4 | 128021 | BioLegend |
| Anti-mouse Ly6G (Rat monoclonal) | APC-Cy7 | 1/1600 | 1A8 | 127624 | BioLegend |
| Anti-mouse CD11c (Rat monoclonal) | PE-Cy5.5 | 1/400 | N418 | 35-0114-80 | Invitrogen |
| Anti-mouse MHC II (Rat monoclonal) | AF700 | 1/200 | M5/114.15.2 | 56-5321-80 | Invitrogen |
| Anti-mouse CD3 (Rat monoclonal) | BV605 | 1/20 | 17A2 | 100237 | BioLegend |
| Anti-mouse CD19 (Rat monoclonal) | BV711 | 1/100 | 6D5 | 115555 | BioLegend |
| Anti-mouse F4/80 (Rat monoclonal) | PE/Dazzle 594 | 1/160 | BM8 | 123145 | BioLegend |
| Anti-mouse BAFF (Rat monoclonal) | PE | 1/10 | 121808 | IC1357P | R&D Systems |
| Anti-mouse CD138 (Rat monoclonal) | BV605 | 1/800 | 281-2 | 142515 | BioLegend |
| Anti-mouse CD1d (Rat monoclonal) | APC | 1/200 | 1B1 | 17-0011-82 | Invitrogen |
| Anti-mouse CD73 (Rat monoclonal) | PerCP efluor710 | 1/100 | eBioTY/11.8 (TY/11.8) | 46-0731-82 | Invitrogen |
| Anti-mouse CD3 (Rat monoclonal) | AF700 | 1/200 | 17A2 | 56-0032-82 | Invitrogen |
| Anti-mouse IgA (Rat monoclonal) | PE | 1/100 | mA-6E1 | 12-4204-81 | Invitrogen |
| Anti-mouse IgM (Rat monoclonal) | PE | 1/100 | RMM-1 | 406507 | BioLegend |
| Anti-mouse IgG (Goat monoclonal) | AF488 | 1/100 | Polyclonal | A11001 | Invitrogen |
| Anti-mouse T-bet (Rat monoclonal) | PE/Dazzle 594 | 1/200 | 4B10 | 644828 | BioLegend |
| Anti-mouse RORγT (Rat monoclonal) | BV650 | 1/100 | Q31-378 | 564722 | BioLegend |
| Anti-mouse FoxP3 (Rat monoclonal) | FITC | 1/100 | FJK-16s | 11-5773-82 | Invitrogen |

**Extended Data Table 4c |** Antibodies used for mouse immunofluorescence

| Target / Host species | Fluorophore | Dilution (final) | Clone | Catalogue number | Vendor |
| --- | --- | --- | --- | --- | --- |
| Anti-mouse IgM (goat polyclonal) | TexasRed | 1/100 | N/A | 1021-07 | Southern Biotech |
| Anti-mouse CD45R (B220) (rat polyclonal) | TexasRed | 1/100 | N/A | 1665-10 | Southern Biotech |
| Biotinylated peanut agglutinin | N/A | 1/50 | N/A | B-1075 | Biolynx inc |
| Anti-mouse CD169 (rat monoclonal) | FITC | 1/100 | MOMA-1 | MCA947F | BioRad |
| Anti-mouse IgA Biotin (goat polyclonal) | N/A | 1/200 | N/A | 1040-08 | Southern Biotech |
| Streptavidin conjugated | FITC | 1/100 | N/A | S32354 | Invitrogen |
| Anti-mouse ZO-1 (rabbit polyclonal) | N/A | 1/50 | NA | 61-7300 | Thermo Fisher |
| Anti-rabbit IgG secondary antibody (goat polyclonal) | FITC | 1/1000 | NA | A27034 | Thermo Fisher |
| Anti-mouse GFAP (mouse monoclonal) | FITC | 1/50 | GA-5 | 53-9892-82 | Thermo Fisher |
| Anti-mouse IBA-1 (rabbit polyclonal) | N/A | 1/500 | N/A | PA5-27436 | Invitrogen |
