# Supplementary material
Source: Research Square preprint supplement (doi:10.21203/rs.3.rs-8876163/v1)
Supplement: Supplementary file 3 [file 0d040537fcd2682f21d2efde.docx]

| Characteristic | Pandemic controls  n=17 | Long COVID  n=103 | *P* value |
| --- | --- | --- | --- |
| Age, years median (IQR) | 51 (46-67) | 49 (40-58) | 0.256 |
| Female sex, n (%) | 8 (47) | 67 (65) | 0.182 |
| Body mass index, kg/m2, median (IQR) | 28.2 (25.0-30.3) | 25.3 (22.2-28.8) | 0.084 |
| Time since SARS-CoV2 infection at enrolment, months, median (IQR) | NA | 5.3 (3.9-7.5) | NA |
| Hospitalized during acute COVID-19, n (%) | NA | 0 (0) | NA |
| Vaccinated prior to infection, n (%) | NA | 12 (12) | NA |
| ≥1 vaccine dose before enrolment, n (%) | 15 (88) | 63 (62) | 0.031 |
| Pre-existing autoimmune disease, n (%) | 0 (0) | 15 (15) | 0.125 |
| Pre-existing gastrointestinal disease, n (%) | 0 (0) | 21 (20) | 0.041 |
| Number of long COVID symptoms, median (IQR) | NA | 6 (3-9) | NA |

**Extended Data Table 1 |** Characteristics of cohort participants included in immunological analyses on enrolment

*P* values were calculated using Wilcoxon rank-sum (two-sided) test or Fisher’s exact test, as appropriate. IQR, interquartile range; NA, not applicable.
