# Supplementary material
Source: Research Square preprint supplement (doi:10.21203/rs.3.rs-8876163/v1)
Supplement: Supplementary file 4 [file 285a57931e1a2b88d3ed5814.docx]

**Extended Data Table 3 |** Sample availability and longitudinal completeness

| Group | 3-6 months /enrolment visit | 12 months | 24 months | Paired 3-6 → 12  months | Paired 12 → 24  months |
| --- | --- | --- | --- | --- | --- |
| Pandemic controls | 17 | NA | NA | NA | NA |
| Long COVID | 81 | 78 | 50 | 56 | 45 |

Numbers indicate participants with available samples at each time point. Paired samples refer to matched longitudinal samples from the same individual. NA, not applicable.
