# Supplementary material
Source: Research Square preprint supplement (doi:10.21203/rs.3.rs-8876163/v1)
Supplement: Supplementary file 5 [file 8dc5a90a04b01f6463135c40.docx]

**Extended Data Table 6 |** Characteristics of human donors used for faecal microbiota transfer

| Donor identifier | Sex | Age (years) | LC severity | Neurological symptoms | Serum  Zonulin  (ng/mL) | Plasma BAFF  (pg/mL) | Human stool SARS-CoV-2 spike (fg/mL) | Human stool BAFF (ng/mL) |
| --- | --- | --- | --- | --- | --- | --- | --- | --- |
| LC7 | F | 44 | Severe | Yes | 241 | 1364 | 0 | 0 |
| LC6 | F | 45 | Severe | Yes | 203 | 1409 | 0 | 2.29 |
| LC2 | F | 38 | Severe | Yes | 304 | 1394 | 812 | 0 |
| LC4 | F | 60 | Severe | Yes | 49 | 1379 | 0 | 35.93 |
| LC3 | F | 59 | Mild | No | 24 | 584 | 0 | 12.07 |
| LC5 | F | 34 | Mild | No | 21 | 254 | Not available | Not available |
| LC8 | F | 49 | Mild | No | 13 | 588 | 0 | 0 |

Long COVID (LC) severity was defined based on neurological symptoms burden and biomarker profiles. BAFF, B-cell activating factor.
