# Supplementary material
Source: Research Square preprint supplement (doi:10.21203/rs.3.rs-8876163/v1)
Supplement: Supplementary file 6 [file f4bd6dcd4b77380a289843e8.docx]

**Extended Data Table 5 |** Mouse experimental group sizes

| Experiment | Donor group; Sample identifier | Treatment | n (mice) | Sex |
| --- | --- | --- | --- | --- |
| 1 | Mild; LC1 | None | 5 | Female |
| 1 | Severe; LC2 | None | 5 | Female |
| 2 | Mild; LC3 | None | 5 | Female |
| 2 | Severe; LC4 | None | 5 | Female |
| 3 | Mild; LC8 | None | 5 | Female |
| 3 | Severe; LC7 | None | 5 | Female |
| 4 | Mild; LC5 | None | 5 | Female |
| 4 | Severe; LC6 | None | 5 | Female |
| 5 | Severe; LC6 | Anti-BAFF | 5 | Female |
| 5 | Severe; LC6 | Isotype control | 5 | Female |
| 6 | Severe; LC6 | Anti-BAFF | 5 | Female |
| 6 | Severe; LC6 | Isotype control | 5 | Female |

All mice were female germ-free C57BL/6.
